# Supplementary material for: Primary aldosteronism: molecular medicine meets public health
Source: PubMed Central journal article supplement (PMC7615304; doi:10.1038/s41581-023-00753-6), 2023-08-23
Supplement: EMS187489-supplement-Supplementary_Material.pdf [file EMS187489-supplement-Supplementary_Material.pdf]

**Supplementary Table 1 | 40 genes with at least 4-fold higher expression in ZG than ZF**

| <b>Gene Symbol</b> | <b>Fold-Change<br/>(G vs. F)</b> | <b>p-value</b> | <b>Gene Name</b>                                            |
|--------------------|----------------------------------|----------------|-------------------------------------------------------------|
| LGR5               | 25.0                             | 1.6E-23        | leucine-rich repeat-containing G protein-coupled receptor 5 |
| VSNL1              | 23.6                             | 3.6E-23        | visinin-like 1                                              |
| ANO4               | 19.9                             | 6.6E-24        | anoctamin 4                                                 |
| NEFM               | 14.8                             | 9.2E-12        | neurofilament, medium polypeptide                           |
| VCAN               | 14.3                             | 1.9E-13        | versican                                                    |
| DACH1              | 14.2                             | 1.4E-21        | dachshund homolog 1 (Drosophila)                            |
| NR4A2              | 10.9                             | 6.2E-08        | nuclear receptor subfamily 4, group A, member 2             |
| KIAA1210           | 8.9                              | 5.4E-11        | KIAA1210                                                    |
| SFRP4              | 8.7                              | 2.3E-10        | secreted frizzled-related protein 4                         |
| C12orf75           | 7.2                              | 4.4E-13        | chromosome 12 open reading frame 75                         |
| C9orf84            | 7.0                              | 5.1E-13        | chromosome 9 open reading frame 84                          |
| VAT1L              | 6.9                              | 9.2E-17        | vesicle amine transport protein 1 homolog                   |
| EDNRA              | 6.5                              | 1.2E-16        | endothelin receptor type A                                  |
| OGN                | 6.3                              | 5.2E-12        | osteoglycin                                                 |
| NR4A3              | 5.9                              | 3.1E-08        | nuclear receptor subfamily 4, group A, member 3             |
| SESN3              | 5.9                              | 6.1E-16        | sestrin 3                                                   |
| LEF1               | 5.9                              | 4.3E-15        | lymphoid enhancer-binding factor 1                          |
| PLD5               | 5.9                              | 2.6E-12        | phospholipase D family, member 5                            |
| CDH12              | 5.8                              | 4.5E-10        | cadherin 12, type 2 (N-cadherin 2)                          |
| HLF                | 5.7                              | 5.7E-16        | hepatic leukemia factor                                     |
| TMEM176A           | 5.6                              | 1.1E-08        | transmembrane protein 176A                                  |
| LAMP5              | 5.6                              | 7.1E-11        | lysosomal-associated membrane protein family, member 5      |
| PDE5A              | 5.6                              | 2.2E-15        | phosphodiesterase 5A, cGMP-specific                         |
| GABBR2             | 5.4                              | 8.3E-13        | gamma-aminobutyric acid (GABA) B receptor, 2                |
| PTGDS              | 5.4                              | 1.1E-14        | prostaglandin D2 synthase 21kDa (brain)                     |
| POSTN              | 5.4                              | 7.5E-08        | periostin, osteoblast specific factor                       |
| RSPO3              | 5.3                              | 3.3E-11        | R-spondin 3 homolog (Xenopus laevis)                        |
| RBP4               | 5.0                              | 3.8E-07        | retinol binding protein 4, plasma                           |
| EGR3               | 5.0                              | 9.9E-09        | early growth response 3                                     |
| PDE2A              | 4.7                              | 1.3E-16        | phosphodiesterase 2A, cGMP-stimulated                       |
| COL14A1            | 4.7                              | 3.1E-15        | collagen, type XIV, alpha 1                                 |
| BICC1              | 4.7                              | 5.3E-11        | BICC1                                                       |
| LMOD1              | 4.5                              | 3.0E-11        | leiomodulin 1 (smooth muscle)                               |
| CACNB2             | 4.5                              | 2.6E-10        | calcium channel, voltage-dependent, beta 2 subunit          |
| PCP4               | 4.4                              | 5.7E-06        | Purkinje cell protein 4                                     |
| ATP10A             | 4.4                              | 5.3E-15        | ATPase, class V, type 10A                                   |
| TIPARP             | 4.3                              | 8.7E-05        | TCDD-inducible poly(ADP-ribose) polymerase                  |
| MFAP5              | 4.1                              | 1.1E-06        | microfibrillar associated protein 5                         |
| NR4A1              | 4.1                              | 2.5E-07        | nuclear receptor subfamily 4, group A, member 1             |

\*Published in Table S3 of reference [1]

## Reference

1. Zhou, J., et al., *DACH1, a zona glomerulosa selective gene in the human adrenal, activates transforming growth factor- $\beta$  signaling and suppresses aldosterone secretion.* Hypertension, 2015. **65**(5): p. 1103-10.
